# Supplementary material for: Structure and conformational analysis of the anti-HIV reverse transcriptase inhibitor AZT using MP2 and DFT methods. Differences with the natural nucleoside thymidine. Simulation of the 1st phosphorylation step with ATP
Source: Royal Society of Chemistry journal article supplement (doi:10.1039/c4cp03695f), 2014-01-01
Supplement: c4cp03695f1.pdf [file c4cp03695f1.pdf]

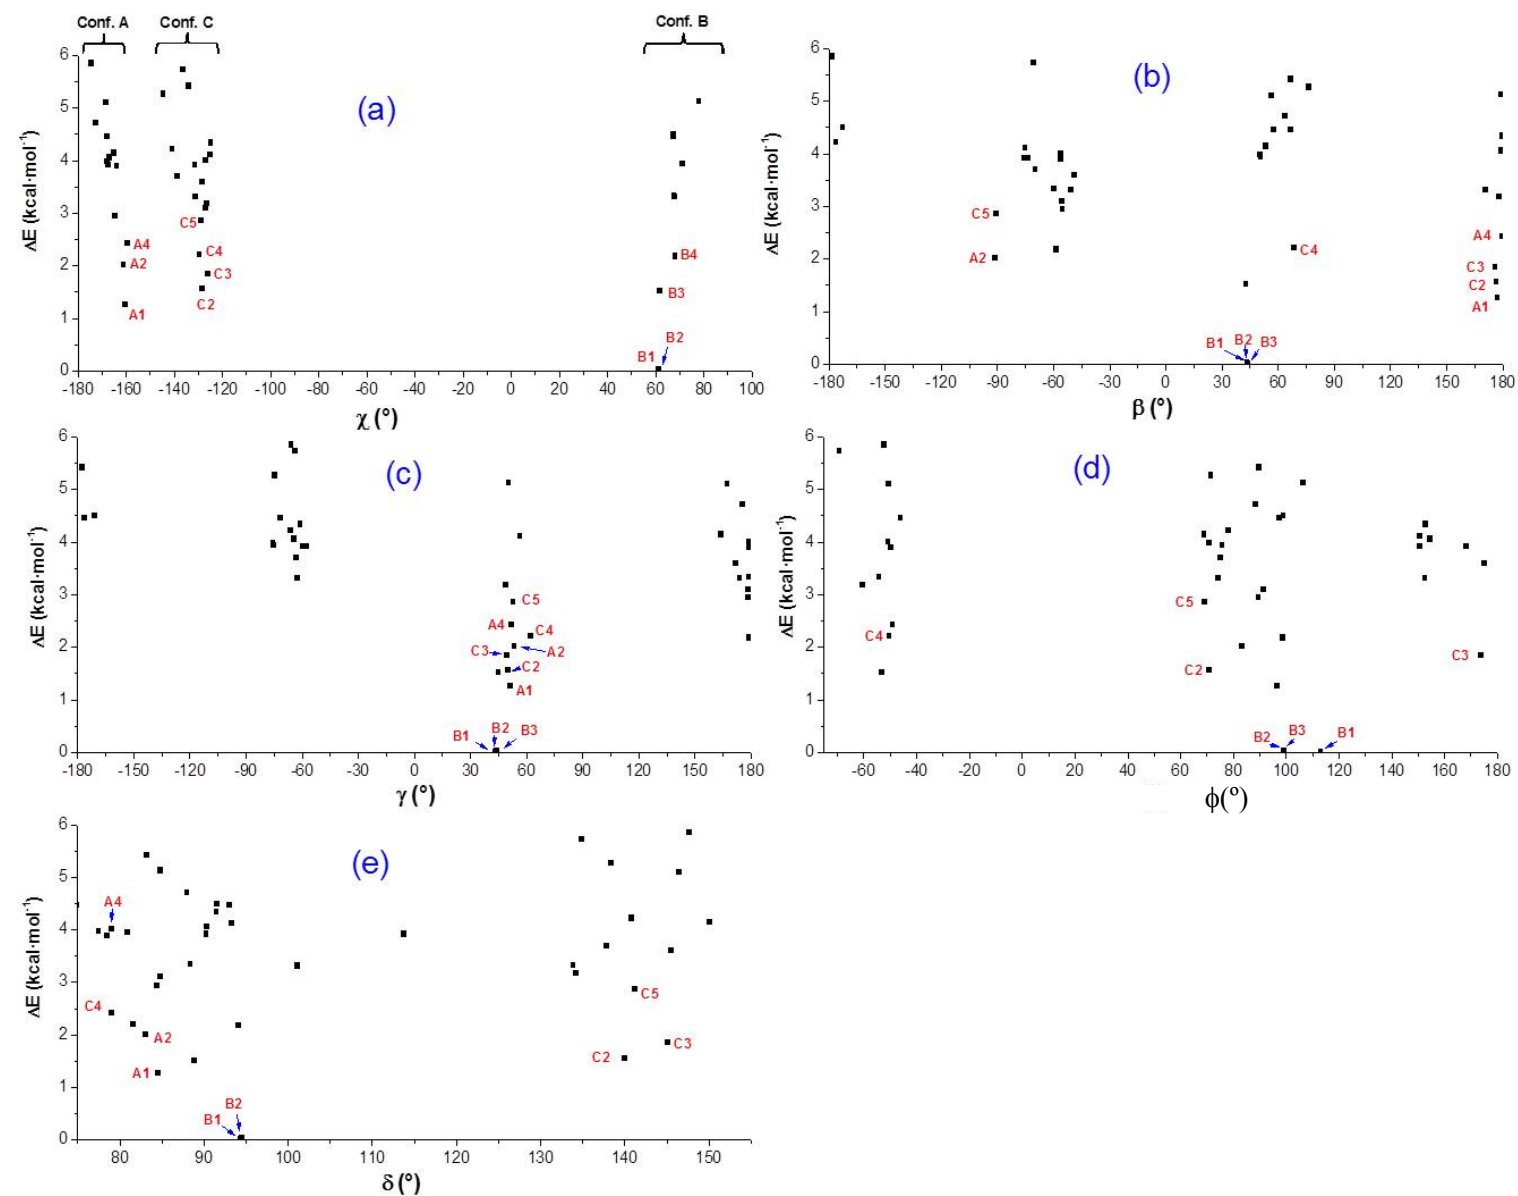

**(Fig. 2-Sup).** Relative energies of all the optimum stable conformers in AZT according to the values of the five exocyclic torsional angles:  $\chi$ ,  $\beta$ ,  $\gamma$ ,  $\phi$ , and  $\delta$ .

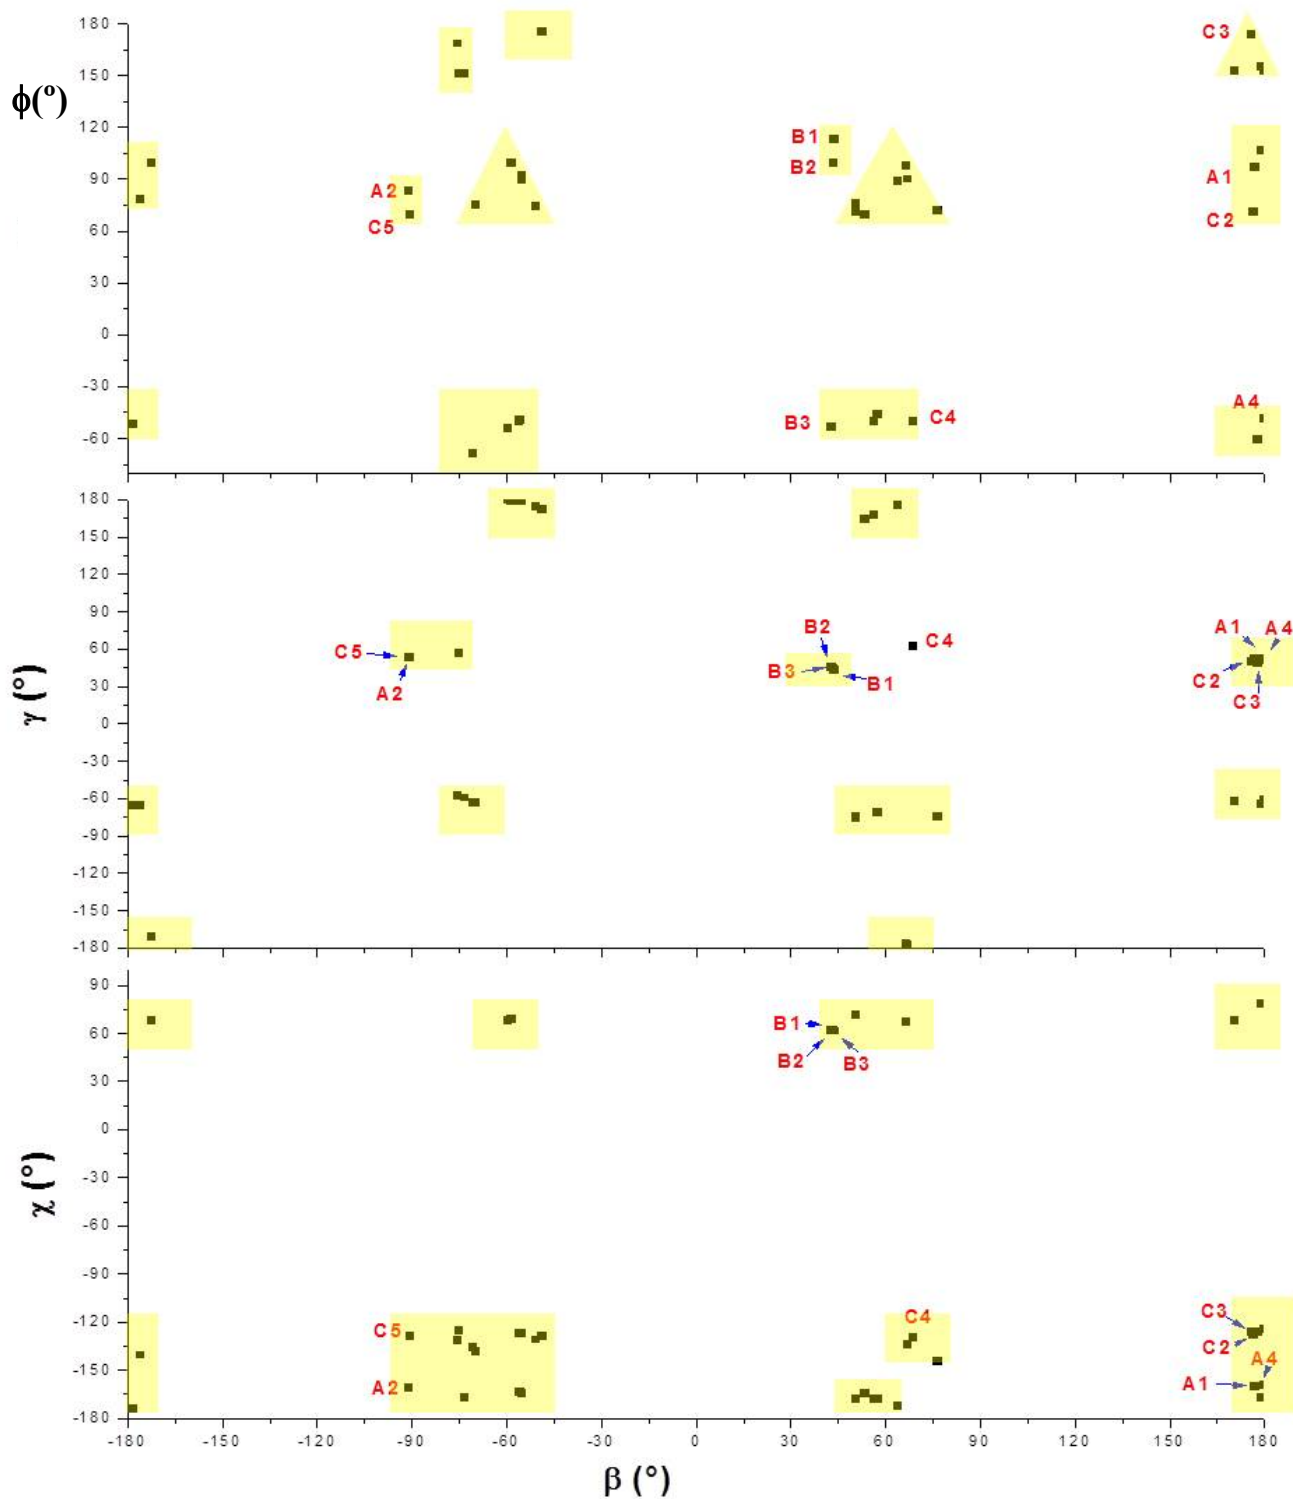

**(Fig. 3-Sup).** Distribution of all the optimum conformers according to the values of the exocyclic torsional angles  $\phi$ ,  $\gamma$  and  $\chi$  versus  $\beta$ . The stability areas of the conformers are marked in yellow colour.

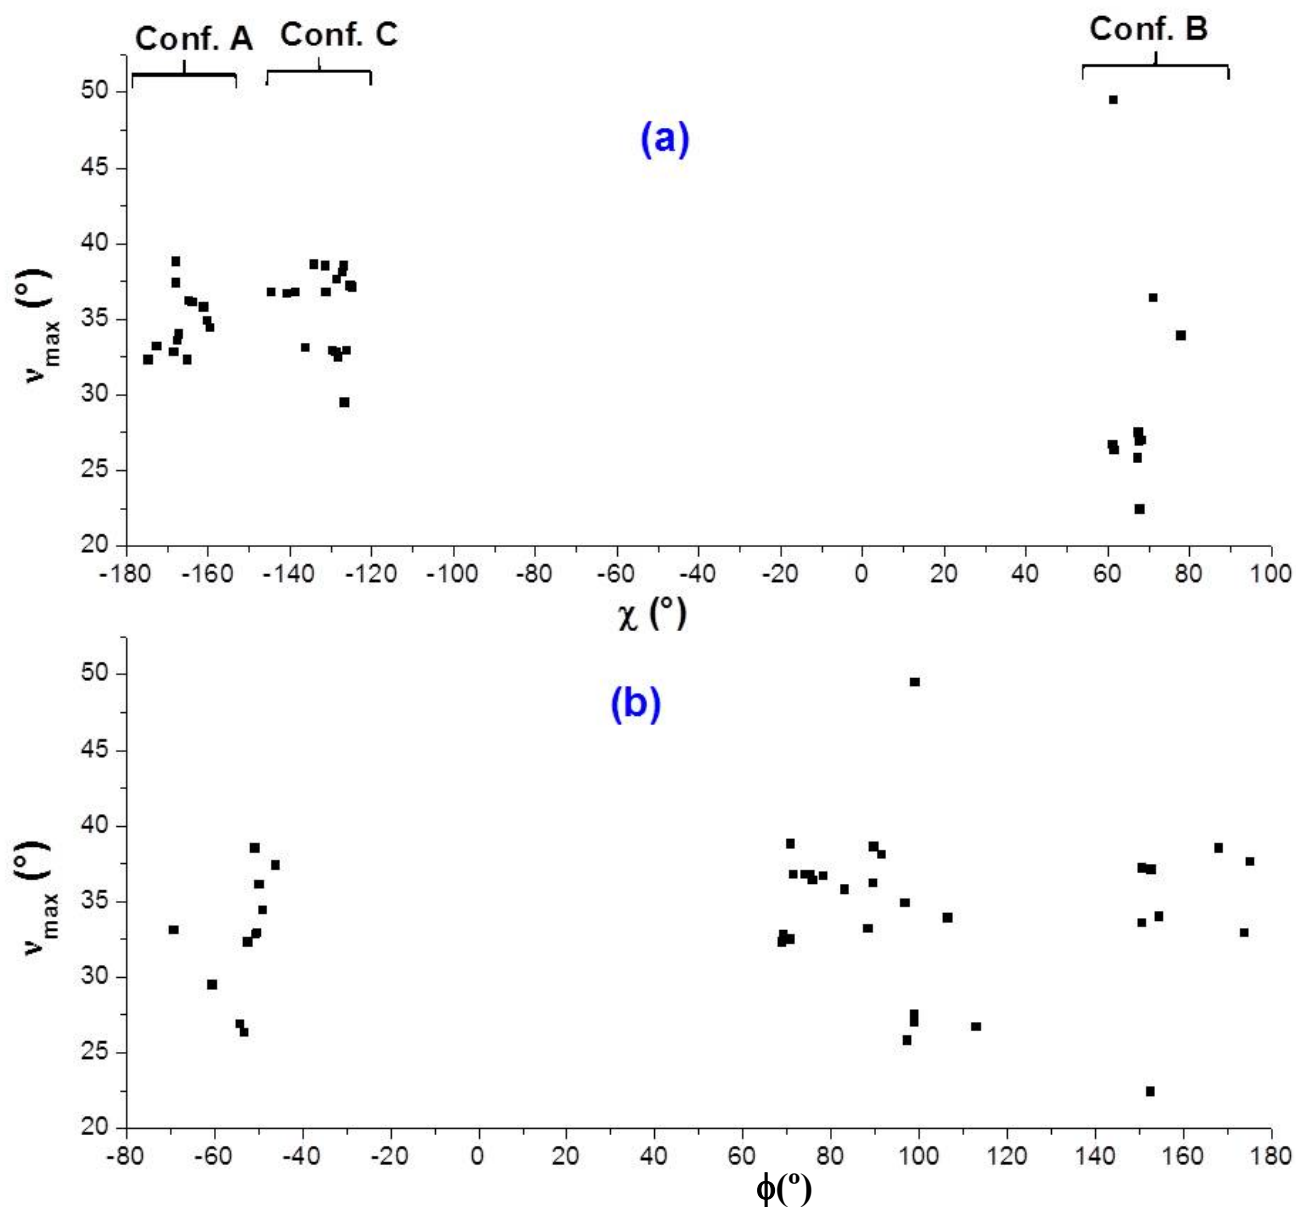

**(Fig. 4-Sup).** Distribution of all the conformers according to the values of the exocyclic torsional angles  $\chi$  and  $\phi$  versus  $v_{\max}$ .

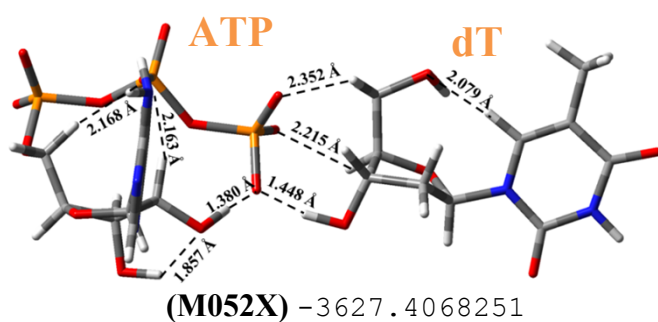

**(Fig. 5-Sup).** An inadequate orientation of the ATP-dT interaction doesn't lead to a rotation of H5'.
